# Supplementary material
Source: PubMed Central journal article supplement (PMC2902881)
Supplement: NIHMS216053-supplement-Suppl_figs.pdf [file NIHMS216053-supplement-Suppl_figs.pdf]

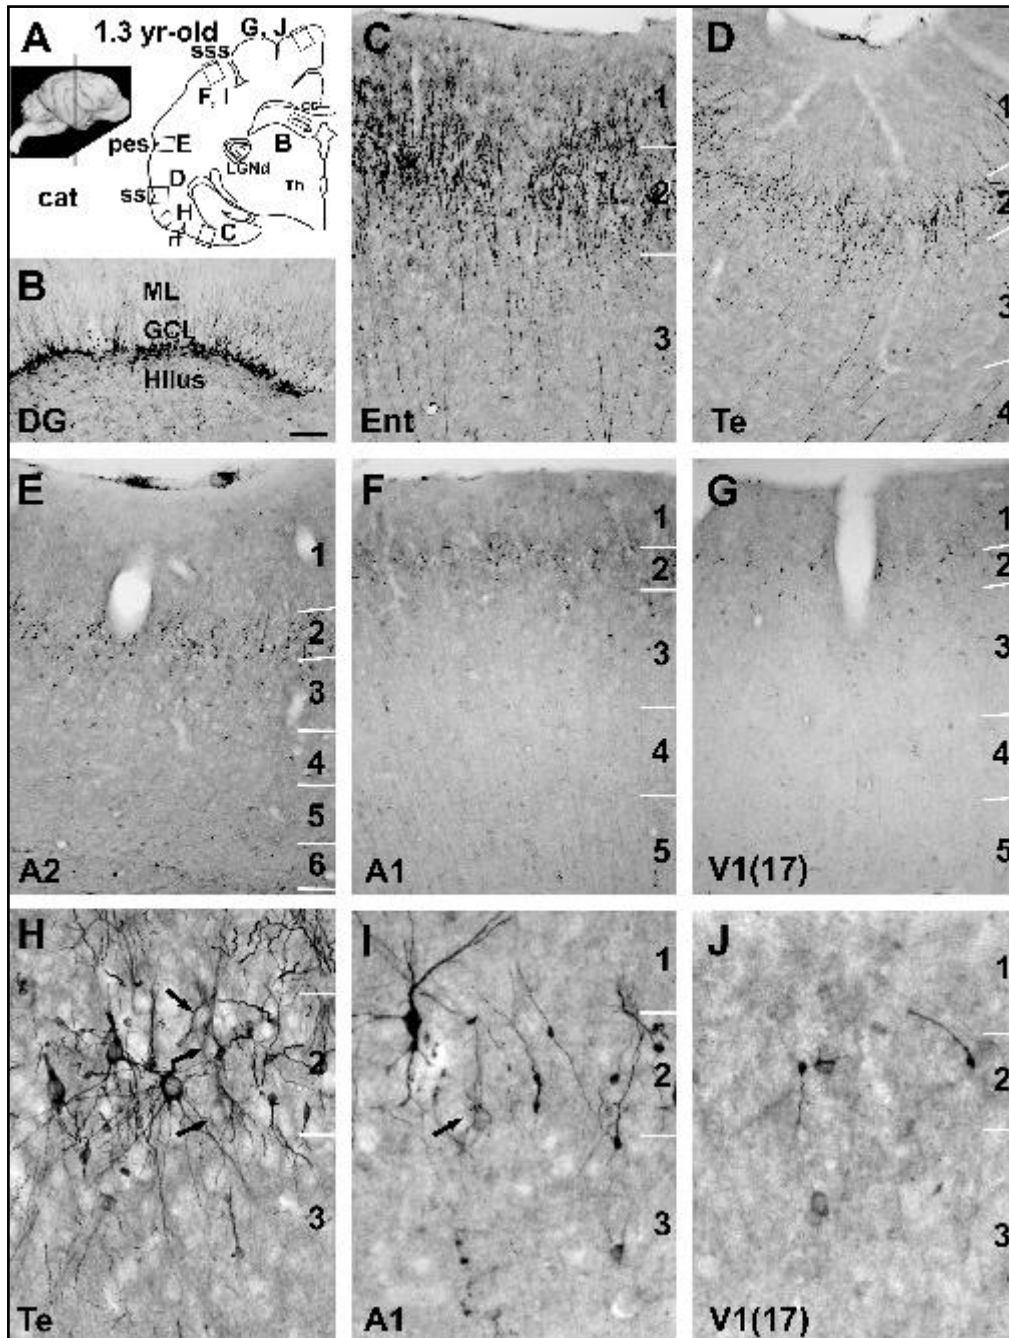

**Supplemental Fig. 1.** Doublecortin (DCX) immunolabeling in various cerebral areas of a young adult cat at the level of the dorsal lateral geniculate nucleus (LGNd), as indicated in the hemispheric map in panel A. Panel B shows intensive DCX labeling at the dentate subgranular zone in this cat (1.3 yr-old). Panels C–G illustrate a high to low gradient of labeling in layers II–III across the temporoparietal cortical areas, in ventrodorsal order from the entorhinal (Ent) (C), low temporal (Te) (D), auditory II (A2) (E), auditory I (A1) (F) and primary visual (V1 or area 17), areas. DCX+ cells in the entorhinal cortex are arranged as island formations in layer II (C). Labeled cells in layers II–III exhibit diverse morphological variation (H–J). Lightly stained cells in medium size are present across the cortex in low density (E–G, I, J). Arrows point to large cells with reduced DCX reactivity (H, I). Anatomic abbreviations are detailed in [Table S1](#) (same for the following figures). Scale bar = 200  $\mu$ m in B applying to C–G, equal to 50  $\mu$ m for H–J.

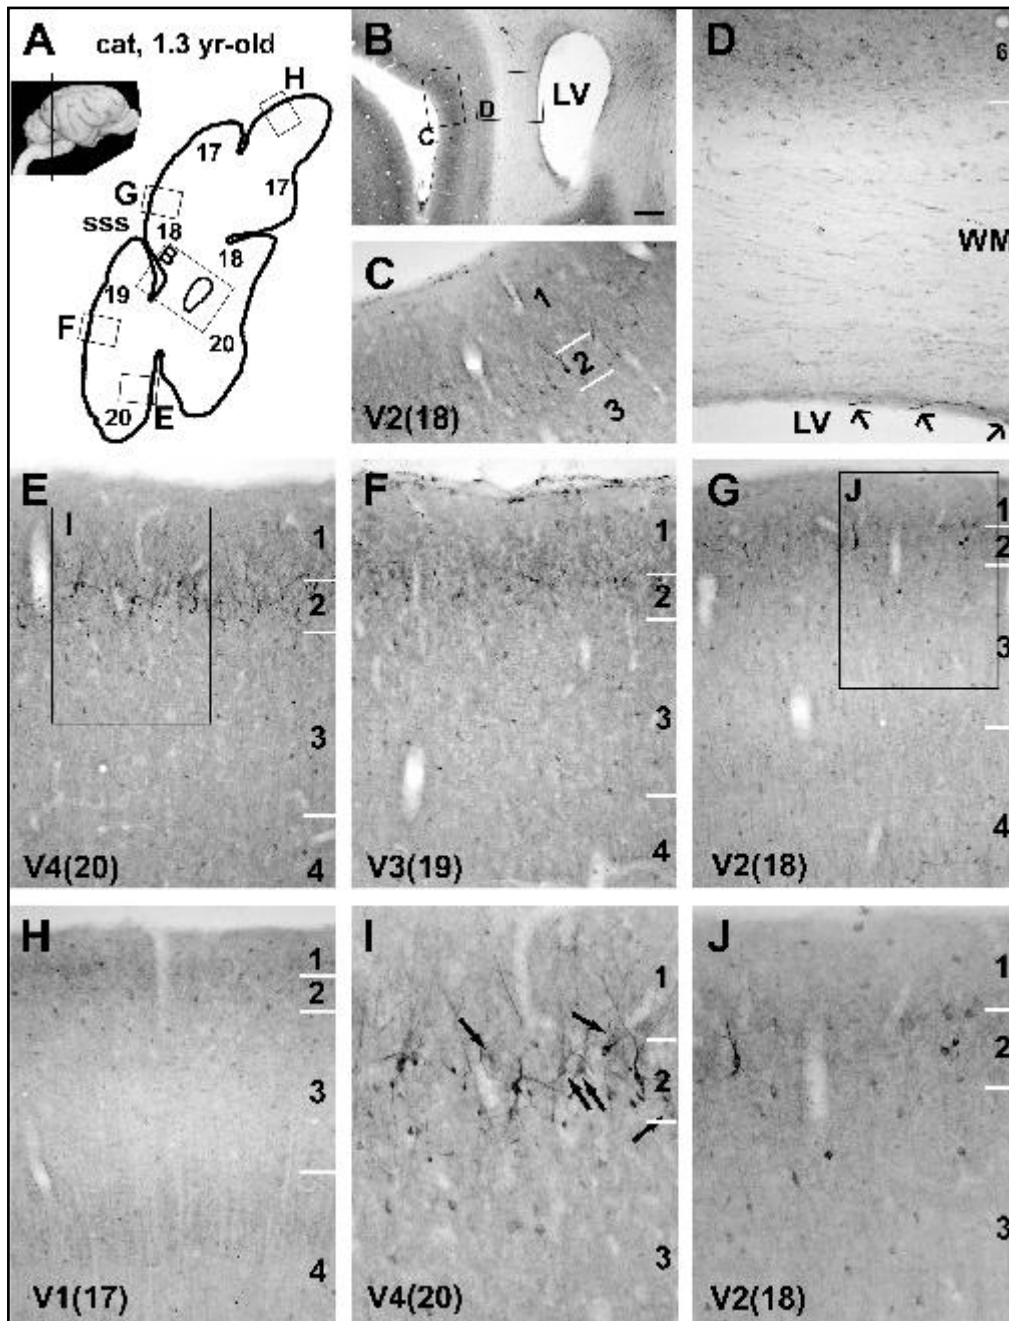

**Supplemental Fig. 2.** Doublecortin immunolabeling in young adult cat occipital cortical areas as indicated on the hemispheric map in panel A. Panels B–D show labeling in the cortical area close to the posterior horn of the lateral ventricle (LV). Labeled cells occur in the cortex (V2 or area 18) deep to layer I, but are absent or rare in the white matter (WM) or the ventricular wall (arrows). Panels E–H illustrate a high to low gradient of labeled cells in layers II and adjacent III from ventrally located area 20 (V4) then area 19 (V3), to dorsally located area 18 (V2) then area 17 (V1). Medium-sized cells with weak reactivity spread over the cortex, mostly layers I–III, in an overall low density. These cells appear also reduced in V1 relative to the associate visual areas (H vs E–G). At higher magnification, many cells in the cellular band in these visual areas are medium to large, in contrast to the prefrontal (Fig. 1D), entorhinal or low temporal area (Figs. 2C–E) wherein most cells are small. These large cells are in multipolar shape with either distinct or reduced labeling intensity (arrows, I). Scale bar = 750  $\mu\text{m}$  in B, equal to 150  $\mu\text{m}$  for C–H and 75  $\mu\text{m}$  for I and J.

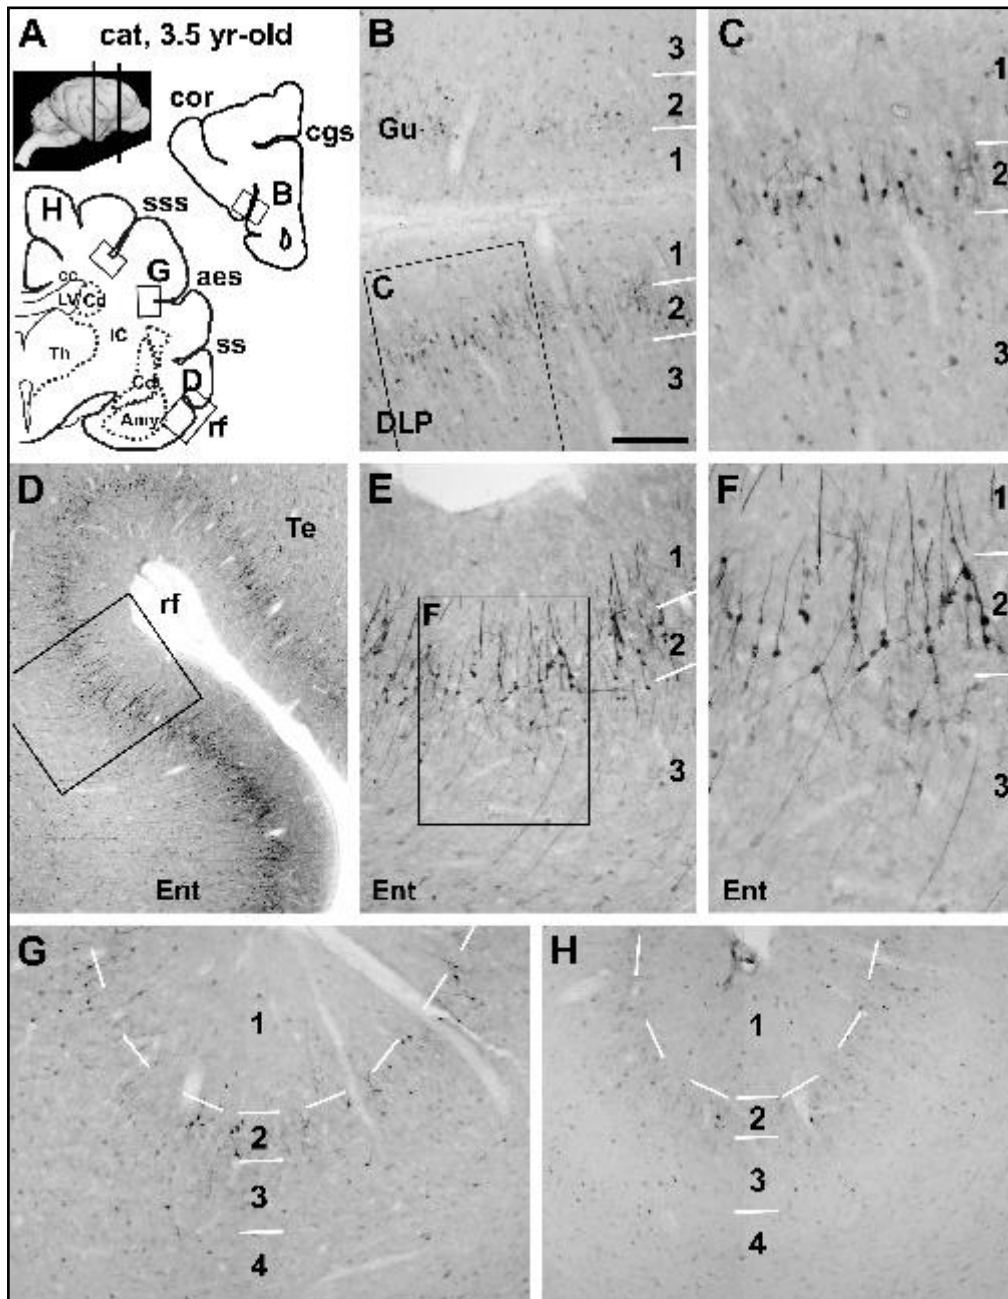

**Supplemental Fig. 3.** Doublecortin immunoreactive (DCX+) cells in representative cortical areas of a 3.5 yr-old cat, as marked on the maps in A. Panel B shows labeled cells in the superficial layers of the dorsal lateral prefrontal (DLP) and gustatory (Gu) areas. Note the higher cell density in the former than the later area. Panels D–H show labeling in the temporoparietal cortical areas. DCX+ cells in layers II–III are considerably dense in the entorhinal and adjoining temporal areas, but are dramatically reduced in dorsally located cortical areas banking the anterior ectosylvian sulcus (aes) (S2–A2 transition, G) or the suprasylvian sulcus (sss) (transition of area 7 to anterior auditory area). Overall, labeled cells in layers II–III exhibit varying size, reactivity and morphology (C, F), whereas labeled cells in other layers are weak reactive medium-sized perikarya. Scale bar = 300 μm in B applying to E, equal to 750 μm for D; 350 μm for G, H and 150 μm for C, F.

**Table 1: Abbreviations**

---

*Anatomical nomenclature*

|      |                                               |
|------|-----------------------------------------------|
| A1   | primary auditory field                        |
| A2   | secondary auditory field                      |
| ACgG | anterior cingulate gyrus, area 24/32          |
| Amy  | amygdala complex                              |
| ias  | inferior arcuate sulcus                       |
| CC   | corpus callosum                               |
| Cd   | caudate nucleus                               |
| cgs  | cingulate sulcus                              |
| cor  | coronal sulcus                                |
| cs   | central sulcus                                |
| DG   | dentate gyrus                                 |
| DLP  | dorsal lateral prefrontal cortex              |
| DMP  | dorsomedial prefrontal cortex                 |
| Ent  | entorhinal cortex                             |
| ES   | ectosylvian sulcus                            |
| GCL  | granule cell layer                            |
| GP   | globus pallidus                               |
| Gu   | gustatory cortex                              |
| hf   | hippocampal fissure                           |
| IC   | internal capsule                              |
| IFG  | inferior frontal gyrus                        |
| Ins  | insular cortex                                |
| ips  | intraparietal sulcus                          |
| ITG  | inferior temporal gyrus                       |
| LGNd | dorsal lateral geniculate nucleus             |
| lf   | lateral fissure                               |
| LV   | lateral ventricle                             |
| ML   | molecular layer                               |
| MTG  | middle temporal gyrus                         |
| mts  | middle temporal sulcus                        |
| pes  | posterior ectosylvian sulcus                  |
| PoG  | postcentral gyrus                             |
| Pu   | putamen                                       |
| ps   | principal sulcus                              |
| rf   | rhinal fissure                                |
| RMS  | rostral migratory stream                      |
| S1   | primary somatosensory cortex (areas, 3, 2, 1) |
| S2   | secondary somatosensory cortex                |
| sas  | superior arcuate sulcus                       |
| SFG  | superior frontal gyrus                        |
| sts  | superior temporal sulcus                      |

|                              |                                                                 |
|------------------------------|-----------------------------------------------------------------|
| STG                          | superior temporal gyrus                                         |
| ss                           | sylvian sulcus                                                  |
| sss                          | suprasylvian sulcus                                             |
| Sub                          | subiculum                                                       |
| Te                           | low temporal cortex                                             |
| Th                           | thalamus                                                        |
| V1                           | primary visual cortex, area 17 (A17)                            |
| V2                           | secondary visual area, area 18 (A18)                            |
| V3                           | third visual area, area 19 (A19)                                |
| V4                           | fourth visual area, area 20 (A20)                               |
| VMF                          | ventromedial frontal cortex                                     |
| <i>Neurochemical markers</i> |                                                                 |
| CB                           | calbindin                                                       |
| CR                           | calretinin                                                      |
| DCX                          | doublecortin                                                    |
| GABA                         | $\gamma$ -aminobutyric acid                                     |
| GAD67                        | glutamic acid decarboxylase-67                                  |
| GFAP                         | glial fibrillary acidic protein                                 |
| NADPH-d                      | $\beta$ -nicotinamide adenine dinucleotide phosphate diaphorase |
| NeuN                         | neuron-specific nuclear protein                                 |
| nNOS                         | neuronal nitric oxide synthase                                  |
| OX42                         | cytokine antigen OX42                                           |
| PSA-NCAM                     | polysialylated neural cell adhesion molecule                    |
| PV                           | parvalbumin                                                     |
| SOM                          | somatostatin                                                    |
| TuJ1                         | neuron-specific beta-tubulin III                                |

---
